# Supplementary material
Source: HighWire-hosted journal article supplement (http://molpharm.aspetjournals.org/highwire/filestream/76786/field_highwire_adjunct_files/7/Supplementary_Table_S4.pdf)
Supplement: Supplementary_Table_S4.pdf [file Supplementary_Table_S4.pdf]

# Identification of Survival Genes in Human Glioblastoma Cells Using siRNA Screening

Nikhil G Thaker, Fang Zhang, Peter R. McDonald, Tong Ying Shun, Michael D Lewen, Ian F. Pollack, and John S. Lazo

Molecular Pharmacology

Supplementary Table S4  
Survival Genes with binning and percent viability.

| <b>Gene Symbol</b> | <b>Full Gene Name</b>                     | <b>Accession</b> | <b>Chromosome (from SOURCE)</b> | <b>GO: Molecular Function</b>                                                                                                                       | <b># of Bins</b> | <b>Percent viability (%)</b> |
|--------------------|-------------------------------------------|------------------|---------------------------------|-----------------------------------------------------------------------------------------------------------------------------------------------------|------------------|------------------------------|
| RAN                | RAN, member RAS oncogene family           | NM_006325        | 12q24.3                         | nucleotide binding; chromatin binding; transcription coactivator activity; GTPase activity; protein binding; GTP binding; androgen receptor binding | 8                | 5.84                         |
| DDX39              | DEAD (Asp-Glu-Ala-Asp) box polypeptide 39 | NM_138998        | 19p13.12                        | nucleotide binding; nucleic acid binding; protein binding; ATP binding; ATP-dependent helicase activity; hydrolase activity                         | 7                | 6.90                         |

## Identification of Survival Genes in Human Glioblastoma Cells Using siRNA Screening

Nikhil G Thaker, Fang Zhang, Peter R. McDonald, Tong Ying Shun, Michael D Lewen, Ian F. Pollack, and John S. Lazo

Molecular Pharmacology

|           |                                                             |           |           |                                                                                                                                                                                  |   |       |
|-----------|-------------------------------------------------------------|-----------|-----------|----------------------------------------------------------------------------------------------------------------------------------------------------------------------------------|---|-------|
| K-ALPHA-1 | K-ALPHA-1                                                   | NM_006082 |           | nucleotide binding; GTPase activity; structural molecule activity; GTP binding                                                                                                   | 7 | 8.22  |
| PSMC3     | proteasome (prosome, macropain) 26S subunit, ATPase, 3      | NM_002804 | 11p12-p13 | nucleotide binding; transcription coactivator activity; transcription corepressor activity; protein binding; ATP binding; hydrolase activity; nucleoside-triphosphatase activity | 7 | 8.35  |
| POLR2F    | polymerase (RNA) II (DNA directed) polypeptide F            | NM_021974 | 22q13.1   | DNA binding; DNA-directed RNA polymerase activity                                                                                                                                | 7 | 9.66  |
| PSMD14    | proteasome (prosome, macropain) 26S subunit, non-ATPase, 14 | NM_005805 | 2q24.2    | protein binding                                                                                                                                                                  | 6 | 10.90 |

## Identification of Survival Genes in Human Glioblastoma Cells Using siRNA Screening

Nikhil G Thaker, Fang Zhang, Peter R. McDonald, Tong Ying Shun, Michael D Lewen, Ian F. Pollack, and John S. Lazo

Molecular Pharmacology

|        |                                                                                                              |           |         |                                                               |   |       |
|--------|--------------------------------------------------------------------------------------------------------------|-----------|---------|---------------------------------------------------------------|---|-------|
| SIAT7E | ST6 (alpha-N-acetylneuraminyl-2,3-beta-galactosyl-1,3)-N-acetylgalactosaminide alpha-2,6-sialyltransferase 5 | NM_030965 |         | sialyltransferase activity                                    | 7 | 11.16 |
| SPINK1 | serine protease inhibitor, Kazal type 1                                                                      | NM_003122 |         | serine-type endopeptidase inhibitor activity; protein binding | 5 | 11.19 |
| SIAT4B | ST3 beta-galactoside alpha-2,3-sialyltransferase 2                                                           | NM_006927 | 16q22.1 | beta-galactoside alpha-2,3-sialyltransferase activity         | 7 | 11.25 |
| BTN2A3 | butyrophilin, subfamily 2, member A3                                                                         | NM_024018 | 6p22.1  |                                                               | 7 | 11.45 |

## Identification of Survival Genes in Human Glioblastoma Cells Using siRNA Screening

Nikhil G Thaker, Fang Zhang, Peter R. McDonald, Tong Ying Shun, Michael D Lewen, Ian F. Pollack, and John S. Lazo

Molecular Pharmacology

|        |                                                              |           |         |                                                                                                                                                                                                                                          |   |       |
|--------|--------------------------------------------------------------|-----------|---------|------------------------------------------------------------------------------------------------------------------------------------------------------------------------------------------------------------------------------------------|---|-------|
| SPTLC1 | serine<br>palmitoyltransferase, long<br>chain base subunit 1 | NM_178324 | 9q22.2  | catalytic activity; serine C-<br>palmitoyltransferase activity;<br>protein binding;<br>acyltransferase activity;<br>transferase activity;<br>transferase activity,<br>transferring nitrogenous<br>groups; pyridoxal phosphate<br>binding | 7 | 11.66 |
| PSMC6  | proteasome (prosome,<br>macropain) 26S subunit,<br>ATPase, 6 | NM_002806 | 14q22.1 | nucleotide binding; ATP<br>binding; hydrolase activity;<br>ATPase activity; protein<br>binding, bridging                                                                                                                                 | 6 | 12.17 |

## Identification of Survival Genes in Human Glioblastoma Cells Using siRNA Screening

Nikhil G Thaker, Fang Zhang, Peter R. McDonald, Tong Ying Shun, Michael D Lewen, Ian F. Pollack, and John S. Lazo

Molecular Pharmacology

|         |                                                                                                    |           |                  |                                                                                                                                                                                                                                                                          |   |       |
|---------|----------------------------------------------------------------------------------------------------|-----------|------------------|--------------------------------------------------------------------------------------------------------------------------------------------------------------------------------------------------------------------------------------------------------------------------|---|-------|
| HLCS    | holocarboxylase synthetase<br>(biotin-[propionyl-Coenzyme A-carboxylase (ATP-hydrolysing)] ligase) | NM_000411 | 21q22.1 21q22.13 | biotin-[acetyl-CoA-carboxylase] ligase activity;<br>biotin-[methylcrotonoyl-CoA-carboxylase] ligase activity;<br>biotin-[methylmalonyl-CoA-carboxytransferase] ligase activity; biotin-[propionyl-CoA-carboxylase (ATP-hydrolysing)] ligase activity;<br>ligase activity | 6 | 12.48 |
| TUBGCP6 | tubulin, gamma complex associated protein 6                                                        | NM_020461 | 22q13.31-q13.33  | microtubule binding                                                                                                                                                                                                                                                      | 7 | 13.45 |

# Identification of Survival Genes in Human Glioblastoma Cells Using siRNA Screening

Nikhil G Thaker, Fang Zhang, Peter R. McDonald, Tong Ying Shun, Michael D Lewen, Ian F. Pollack, and John S. Lazo

Molecular Pharmacology

|       |                                                                   |           |      |                                                                                                                                                                                                                                                                 |   |       |
|-------|-------------------------------------------------------------------|-----------|------|-----------------------------------------------------------------------------------------------------------------------------------------------------------------------------------------------------------------------------------------------------------------|---|-------|
| BUB1B | BUB1 budding uninhibited by benzimidazoles 1 homolog beta (yeast) | NM_001211 |      | nucleotide binding; protein serine/threonine kinase activity; protein binding; ATP binding; transferase activity                                                                                                                                                | 5 | 13.49 |
| GRHPR | glyoxylate reductase/hydroxypyruvate reductase                    | NM_012203 | 9q12 | catalytic activity; protein binding; glycerate dehydrogenase activity; oxidoreductase activity; oxidoreductase activity, acting on the CH-OH group of donors, NAD or NADP as acceptor; hydroxypyruvate reductase activity; glyoxylate reductase (NADP) activity | 6 | 14.21 |

# Identification of Survival Genes in Human Glioblastoma Cells Using siRNA Screening

Nikhil G Thaker, Fang Zhang, Peter R. McDonald, Tong Ying Shun, Michael D Lewen, Ian F. Pollack, and John S. Lazo

Molecular Pharmacology

|       |                         |           |                                                                                                                                                                                                                      |   |       |
|-------|-------------------------|-----------|----------------------------------------------------------------------------------------------------------------------------------------------------------------------------------------------------------------------|---|-------|
| TLR2  | toll-like receptor 2    | NM_003264 | lipopolysaccharide receptor activity; transmembrane receptor activity; protein binding; oxidoreductase activity; peptidoglycan binding; Gram-positive bacterial binding                                              | 5 | 15.52 |
| PRKCD | protein kinase C, delta | NM_006254 | nucleotide binding; protein kinase C activity; ATP binding; protein C-terminus binding; enzyme activator activity; zinc ion binding; transferase activity; enzyme binding; diacylglycerol binding; metal ion binding | 5 | 15.55 |

## Identification of Survival Genes in Human Glioblastoma Cells Using siRNA Screening

Nikhil G Thaker, Fang Zhang, Peter R. McDonald, Tong Ying Shun, Michael D Lewen, Ian F. Pollack, and John S. Lazo

Molecular Pharmacology

|       |                                                                               |              |            |                                                                                                                                                                      |   |       |
|-------|-------------------------------------------------------------------------------|--------------|------------|----------------------------------------------------------------------------------------------------------------------------------------------------------------------|---|-------|
| CHN1  | chimerin (chimaerin) 1                                                        | NM_001025201 | 2q31-q32.1 | SH3/SH2 adaptor activity;<br>GTPase activator activity;<br>protein binding; zinc ion<br>binding; diacylglycerol<br>binding; metal ion binding                        | 6 | 15.67 |
| AKT3  | v-akt murine thymoma viral<br>oncogene homolog 3<br>(protein kinase B, gamma) | NM_181690    |            | nucleotide binding; protein<br>serine/threonine kinase<br>activity; protein binding; ATP<br>binding; transferase activity                                            | 5 | 16.28 |
| PSMC5 | proteasome (prosome,<br>macropain) 26S subunit,<br>ATPase, 5                  | NM_002805    |            | nucleotide binding;<br>transcription cofactor activity;<br>ATP binding; hydrolase<br>activity; ATPase activity;<br>thyrotropin-releasing<br>hormone receptor binding | 5 | 17.05 |
| UBL5  | ubiquitin-like 5                                                              | NM_024292    |            |                                                                                                                                                                      | 5 | 19.35 |



# Identification of Survival Genes in Human Glioblastoma Cells Using siRNA Screening

Nikhil G Thaker, Fang Zhang, Peter R. McDonald, Tong Ying Shun, Michael D Lewen, Ian F. Pollack, and John S. Lazo

Molecular Pharmacology

|       |                                 |           |        |                                                                                                                                                                                                |   |       |
|-------|---------------------------------|-----------|--------|------------------------------------------------------------------------------------------------------------------------------------------------------------------------------------------------|---|-------|
| POMT1 | protein-O-mannosyltransferase 1 | NM_007171 | 9q34.1 | mannosyltransferase activity; magnesium ion binding; dolichyl-phosphate-mannose-protein mannosyltransferase activity; transferase activity; transferase activity, transferring glycosyl groups | 6 | 19.39 |
|-------|---------------------------------|-----------|--------|------------------------------------------------------------------------------------------------------------------------------------------------------------------------------------------------|---|-------|

## Identification of Survival Genes in Human Glioblastoma Cells Using siRNA Screening

Nikhil G Thaker, Fang Zhang, Peter R. McDonald, Tong Ying Shun, Michael D Lewen, Ian F. Pollack, and John S. Lazo

Molecular Pharmacology

|        |                                        |           |       |                                                                                                                                                                                                                                   |   |       |
|--------|----------------------------------------|-----------|-------|-----------------------------------------------------------------------------------------------------------------------------------------------------------------------------------------------------------------------------------|---|-------|
| IDH3B  | isocitrate dehydrogenase 3 (NAD+) beta | NM_174856 | 20p13 | magnesium ion binding; isocitrate dehydrogenase (NAD+) activity; electron carrier activity; oxidoreductase activity; oxidoreductase activity, acting on the CH-OH group of donors, NAD or NADP as acceptor; manganese ion binding | 7 | 19.42 |
| TNNI3K | TNNI3 interacting kinase               | NM_015978 |       | nucleotide binding; magnesium ion binding; protein serine/threonine kinase activity; protein tyrosine kinase activity; ATP binding; protein C-terminus binding; transferase activity; troponin I binding                          | 5 | 20.08 |

## Identification of Survival Genes in Human Glioblastoma Cells Using siRNA Screening

Nikhil G Thaker, Fang Zhang, Peter R. McDonald, Tong Ying Shun, Michael D Lewen, Ian F. Pollack, and John S. Lazo

Molecular Pharmacology

|        |                                                             |           |          |                                                                                                                                 |   |       |
|--------|-------------------------------------------------------------|-----------|----------|---------------------------------------------------------------------------------------------------------------------------------|---|-------|
| COX7A2 | cytochrome c oxidase subunit VIIa polypeptide 2 (liver)     | NM_001865 |          | cytochrome-c oxidase activity; electron carrier activity                                                                        | 5 | 20.23 |
| ZAP128 | ZAP128                                                      | NM_006821 | 14q24.3  | carboxylesterase activity; protein binding; palmitoyl-CoA hydrolase activity; hydrolase activity; thiolester hydrolase activity | 6 | 20.51 |
| ITGB3  | integrin, beta 3 (platelet glycoprotein IIIa, antigen CD61) | NM_000212 | 17q21.32 | receptor activity; integrin binding; identical protein binding                                                                  | 5 | 20.75 |
| PIGQ   | phosphatidylinositol glycan, class Q                        | NM_148920 |          | transferase activity, transferring glycosyl groups; phosphatidylinositol N-acetylglucosaminyltransferase activity               | 6 | 20.85 |
| BST1   | bone marrow stromal cell antigen 1                          | NM_004334 |          | NAD+ nucleosidase activity; binding; hydrolase activity                                                                         | 5 | 21.57 |

# Identification of Survival Genes in Human Glioblastoma Cells Using siRNA Screening

Nikhil G Thaker, Fang Zhang, Peter R. McDonald, Tong Ying Shun, Michael D Lewen, Ian F. Pollack, and John S. Lazo

Molecular Pharmacology

|       |                                            |           |         |                                                                                                                                                                                                                                                               |   |       |
|-------|--------------------------------------------|-----------|---------|---------------------------------------------------------------------------------------------------------------------------------------------------------------------------------------------------------------------------------------------------------------|---|-------|
| RRM1  | ribonucleotide reductase<br>M1 polypeptide | NM_001033 | 11p15.5 | nucleotide binding;<br>ribonucleoside-diphosphate<br>reductase activity; protein<br>binding; ATP binding;<br>oxidoreductase activity                                                                                                                          | 7 | 21.76 |
| CLCN3 | chloride channel 3                         | NM_173872 | 4q33    | ion channel activity; voltage-<br>gated ion channel activity;<br>voltage-gated chloride<br>channel activity; protein<br>binding; PDZ domain binding;<br>chloride ion binding; protein<br>homodimerization activity;<br>protein heterodimerization<br>activity | 7 | 22.20 |

## Identification of Survival Genes in Human Glioblastoma Cells Using siRNA Screening

Nikhil G Thaker, Fang Zhang, Peter R. McDonald, Tong Ying Shun, Michael D Lewen, Ian F. Pollack, and John S. Lazo

Molecular Pharmacology

|          |                                                                                                 |           |            |                                                                                                                                                                                                                             |   |       |
|----------|-------------------------------------------------------------------------------------------------|-----------|------------|-----------------------------------------------------------------------------------------------------------------------------------------------------------------------------------------------------------------------------|---|-------|
| GPX2     | glutathione peroxidase 2<br>(gastrointestinal)                                                  | NM_002083 |            | glutathione peroxidase<br>activity; selenium binding;<br>electron carrier activity;<br>oxidoreductase activity                                                                                                              | 5 | 22.70 |
| SLC7A2   | solute carrier family 7<br>(cationic amino acid<br>transporter, $\gamma$ + system),<br>member 2 | NM_003046 | 8p22-p21.3 | basic amino acid<br>transmembrane transporter<br>activity                                                                                                                                                                   | 7 | 23.17 |
| ARHGEF11 | Rho guanine nucleotide<br>exchange factor (GEF) 11                                              | NM_014784 |            | G-protein-coupled receptor<br>binding; signal transducer<br>activity; guanyl-nucleotide<br>exchange factor activity; Rho<br>guanyl-nucleotide exchange<br>factor activity; GTPase<br>activator activity; protein<br>binding | 5 | 24.52 |

## Identification of Survival Genes in Human Glioblastoma Cells Using siRNA Screening

Nikhil G Thaker, Fang Zhang, Peter R. McDonald, Tong Ying Shun, Michael D Lewen, Ian F. Pollack, and John S. Lazo

Molecular Pharmacology

|        |                                                                                                 |           |         |                                                                                                                                                                                        |   |       |
|--------|-------------------------------------------------------------------------------------------------|-----------|---------|----------------------------------------------------------------------------------------------------------------------------------------------------------------------------------------|---|-------|
| POLR2A | polymerase (RNA) II (DNA directed) polypeptide A, 220kDa                                        | NM_000937 |         | magnesium ion binding; DNA binding; DNA-directed RNA polymerase activity; protein binding; zinc ion binding; transferase activity; nucleotidyltransferase activity                     | 5 | 24.82 |
| SMS    | spermine synthase                                                                               | NM_004595 | X       | spermidine synthase activity; transferase activity; spermine synthase activity                                                                                                         | 6 | 24.90 |
| GALNS  | galactosamine (N-acetyl)-6-sulfate sulfatase (Morquio syndrome, mucopolysaccharidosis type IVA) | NM_000512 | 16q24.3 | catalytic activity; N-acetylgalactosamine-4-sulfatase activity; calcium ion binding; sulfuric ester hydrolase activity; hydrolase activity; N-acetylgalactosamine-6-sulfatase activity | 5 | 25.30 |

## Identification of Survival Genes in Human Glioblastoma Cells Using siRNA Screening

Nikhil G Thaker, Fang Zhang, Peter R. McDonald, Tong Ying Shun, Michael D Lewen, Ian F. Pollack, and John S. Lazo

Molecular Pharmacology

|          |                                                             |           |        |                                                                                                            |   |       |
|----------|-------------------------------------------------------------|-----------|--------|------------------------------------------------------------------------------------------------------------|---|-------|
| MPHOSPH1 | M-phase phosphoprotein 1                                    | NM_016195 |        | nucleotide binding;<br>microtubule motor activity;<br>ATP binding; ATPase activity;<br>WW domain binding   | 5 | 26.04 |
| GRCC9    | GRCC9                                                       | NM_032641 |        |                                                                                                            | 5 | 26.60 |
| PSMB2    | proteasome (prosome,<br>macropain) subunit, beta<br>type, 2 | NM_002794 | 1p34.2 | threonine-type<br>endopeptidase activity;<br>peptidase activity                                            | 6 | 26.70 |
| CGI-04   | tyrosyl-tRNA synthetase 2<br>(mitochondrial)                | NM_015936 |        | nucleotide binding; tyrosine-<br>tRNA ligase activity; protein<br>binding; ATP binding; ligase<br>activity | 5 | 27.61 |

## Identification of Survival Genes in Human Glioblastoma Cells Using siRNA Screening

Nikhil G Thaker, Fang Zhang, Peter R. McDonald, Tong Ying Shun, Michael D Lewen, Ian F. Pollack, and John S. Lazo

Molecular Pharmacology

|        |                                                        |           |         |                                                                                                                                                                                                                                       |   |       |
|--------|--------------------------------------------------------|-----------|---------|---------------------------------------------------------------------------------------------------------------------------------------------------------------------------------------------------------------------------------------|---|-------|
| GRIN1  | glutamate receptor, ionotropic, N-methyl D-aspartate 1 | NM_007327 | 9q34.3  | magnesium ion binding; receptor activity; ionotropic glutamate receptor activity; N-methyl-D-aspartate selective glutamate receptor activity; ion channel activity; extracellular-glutamate-gated ion channel activity; calcium ion b | 6 | 29.05 |
| RAB40B | RAB40B, member RAS oncogene family                     | NM_006822 | 17q25.3 | nucleotide binding; GTP binding                                                                                                                                                                                                       | 5 | 29.68 |
| GUSB   | glucuronidase, beta                                    | NM_000181 | 7q21.11 | beta-glucuronidase activity; cation binding                                                                                                                                                                                           | 7 | 29.93 |
| PKD1L3 | polycystic kidney disease 1-like 3                     | NM_181536 | 16q22.3 | ion channel activity; binding; calcium ion binding; sugar binding                                                                                                                                                                     | 5 | 30.47 |



## Identification of Survival Genes in Human Glioblastoma Cells Using siRNA Screening

Nikhil G Thaker, Fang Zhang, Peter R. McDonald, Tong Ying Shun, Michael D Lewen, Ian F. Pollack, and John S. Lazo

Molecular Pharmacology

|        |                                                        |           |         |                                                                                         |   |       |
|--------|--------------------------------------------------------|-----------|---------|-----------------------------------------------------------------------------------------|---|-------|
| PSMB4  | proteasome (prosome, macropain) subunit, beta type, 4  | NM_002796 | 1q21    | threonine-type endopeptidase activity; peptidase activity                               | 5 | 30.56 |
| PSMA6  | proteasome (prosome, macropain) subunit, alpha type, 6 | NM_002791 | 14q13   | RNA binding; threonine-type endopeptidase activity; protein binding; peptidase activity | 6 | 30.62 |
| POLR2G | polymerase (RNA) II (DNA directed) polypeptide G       | NM_002696 |         | RNA binding; DNA-directed RNA polymerase activity; protein binding                      | 5 | 30.81 |
| PSMA4  | proteasome (prosome, macropain) subunit, alpha type, 4 | NM_002789 | 15q25.1 | threonine-type endopeptidase activity; peptidase activity; identical protein binding    | 5 | 31.58 |

## Identification of Survival Genes in Human Glioblastoma Cells Using siRNA Screening

Nikhil G Thaker, Fang Zhang, Peter R. McDonald, Tong Ying Shun, Michael D Lewen, Ian F. Pollack, and John S. Lazo

Molecular Pharmacology

|        |                                                        |           |       |                                                                                                                                                                          |   |       |
|--------|--------------------------------------------------------|-----------|-------|--------------------------------------------------------------------------------------------------------------------------------------------------------------------------|---|-------|
| CYP1B1 | cytochrome P450, family 1, subfamily B, polypeptide 1  | NM_000104 | 2p21  | monooxygenase activity; iron ion binding; protein binding; electron carrier activity; oxygen binding; heme binding; metal ion binding; unspecific monooxygenase activity | 5 | 32.29 |
| PSMA3  | proteasome (prosome, macropain) subunit, alpha type, 3 | NM_152132 | 14q23 | threonine-type endopeptidase activity; protein binding; peptidase activity                                                                                               | 6 | 33.00 |
| PSMA5  | proteasome (prosome, macropain) subunit, alpha type, 5 | NM_002790 |       | threonine-type endopeptidase activity; protein binding; peptidase activity                                                                                               | 6 | 33.87 |
| PSMA2  | proteasome (prosome, macropain) subunit, alpha type, 2 | NM_002787 | 7p13  | threonine-type endopeptidase activity; protein binding; peptidase activity                                                                                               | 6 | 34.50 |

## Identification of Survival Genes in Human Glioblastoma Cells Using siRNA Screening

Nikhil G Thaker, Fang Zhang, Peter R. McDonald, Tong Ying Shun, Michael D Lewen, Ian F. Pollack, and John S. Lazo

Molecular Pharmacology

|       |                                                        |           |         |                                                                                         |   |       |
|-------|--------------------------------------------------------|-----------|---------|-----------------------------------------------------------------------------------------|---|-------|
| PSMA1 | proteasome (prosome, macropain) subunit, alpha type, 1 | NM_148976 | 11p15.1 | RNA binding; threonine-type endopeptidase activity; protein binding; peptidase activity | 5 | 34.72 |
|-------|--------------------------------------------------------|-----------|---------|-----------------------------------------------------------------------------------------|---|-------|
